# Supplementary material for: A 3-dimensional microfluidic platform for modeling human extravillous trophoblast invasion and toxicological screening
Source: Royal Society of Chemistry journal article supplement (doi:10.1039/d0lc01013h), 2020-11-09
Supplement: d0lc01013h1.pdf [file d0lc01013h1.pdf]

# Supplemental Table 1

Primers for quantitative real time PCR.

| Gene         | Primer sequences (5' - 3')   | Product Size | Accession No. |
|--------------|------------------------------|--------------|---------------|
| <i>MMP2</i>  | F: CCTGATGTCCAGCGAGTG        | 172 bp       | NM_001127891  |
| <i>MMP2</i>  | R: CGGCATCCAGGTTATCG         |              |               |
| <i>GAPDH</i> | F: GGGAAGCTCACTGGCATGGCCTTCC | 119 bp       | NM_001256799  |
| <i>GAPDH</i> | R: GCCTGCTTCACCACCTTCTTG     |              |               |

# Supplemental Figure 1

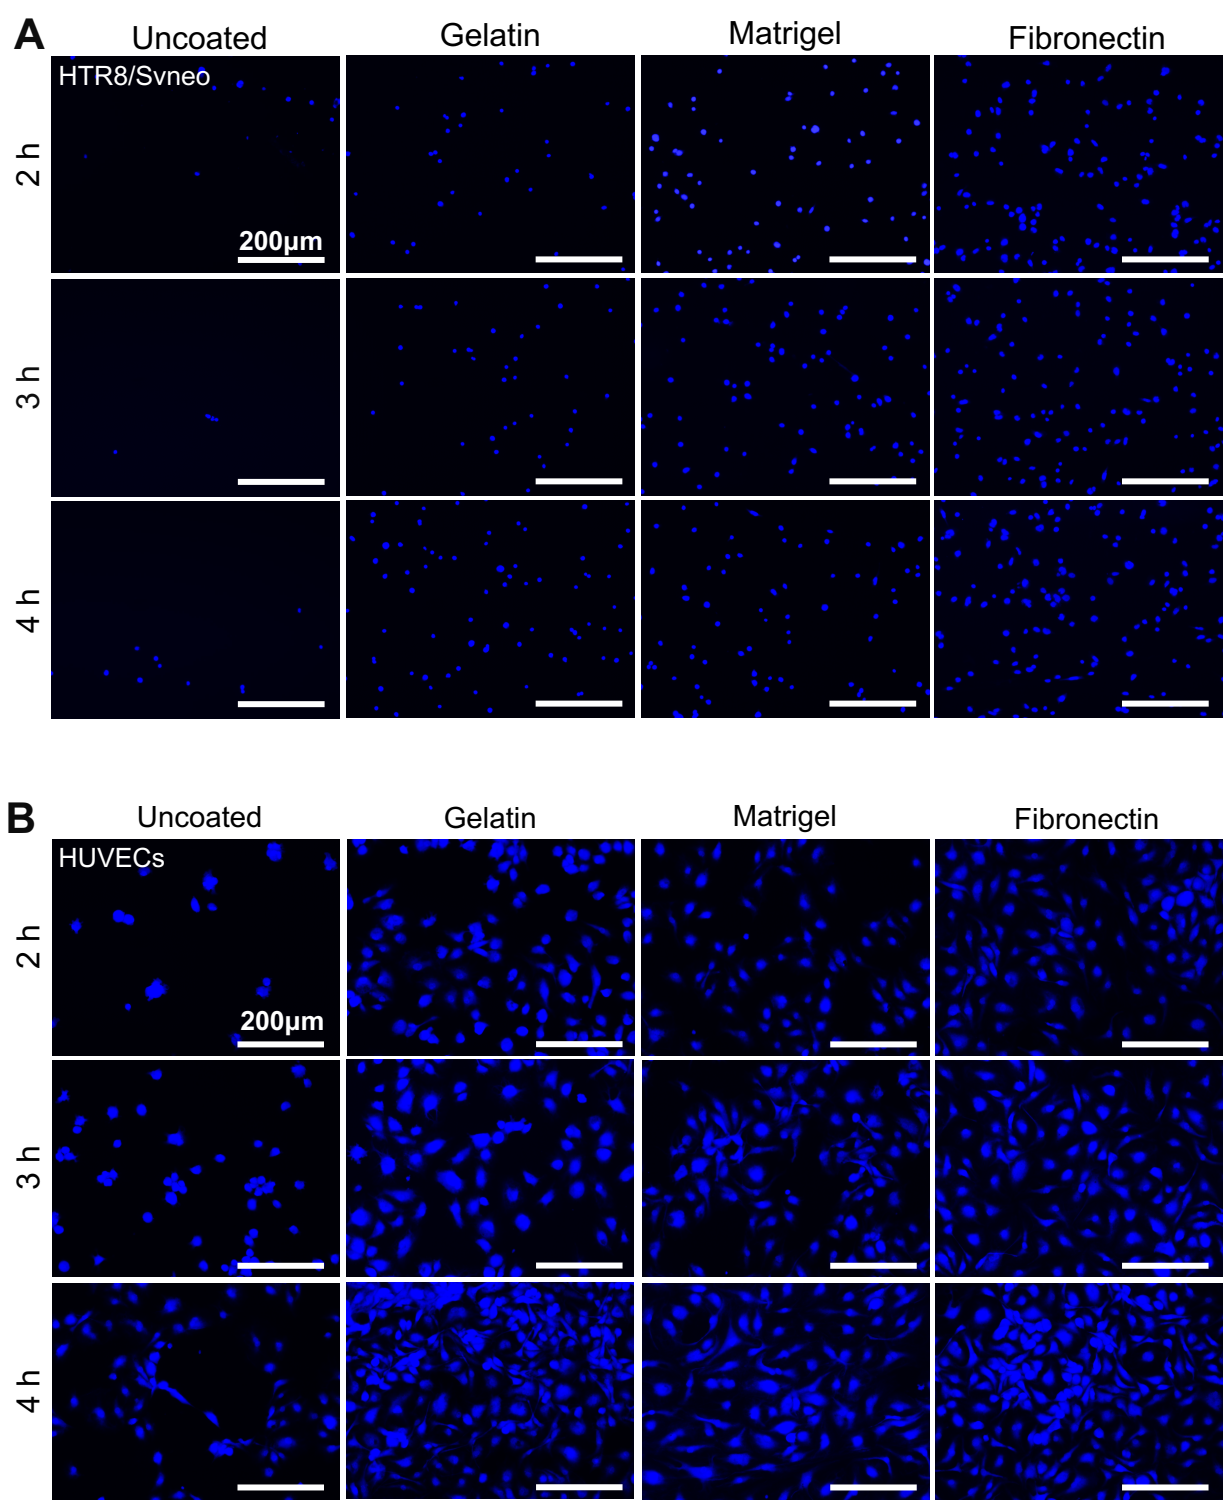

**Supplemental Figure 1.** Testing cell adhesion in extracellular matrix coated dish. Cell adhesion for HTR8/SVneo trophoblast cells (**A**) and human umbilical vein endothelial cells (HUVECs) (**B**) after gelatin, Matrigel and fibronectin coating on petri dishes 2, 3, and 4 h after seeding compared to uncoated dishes.



# Supplemental Figure 2

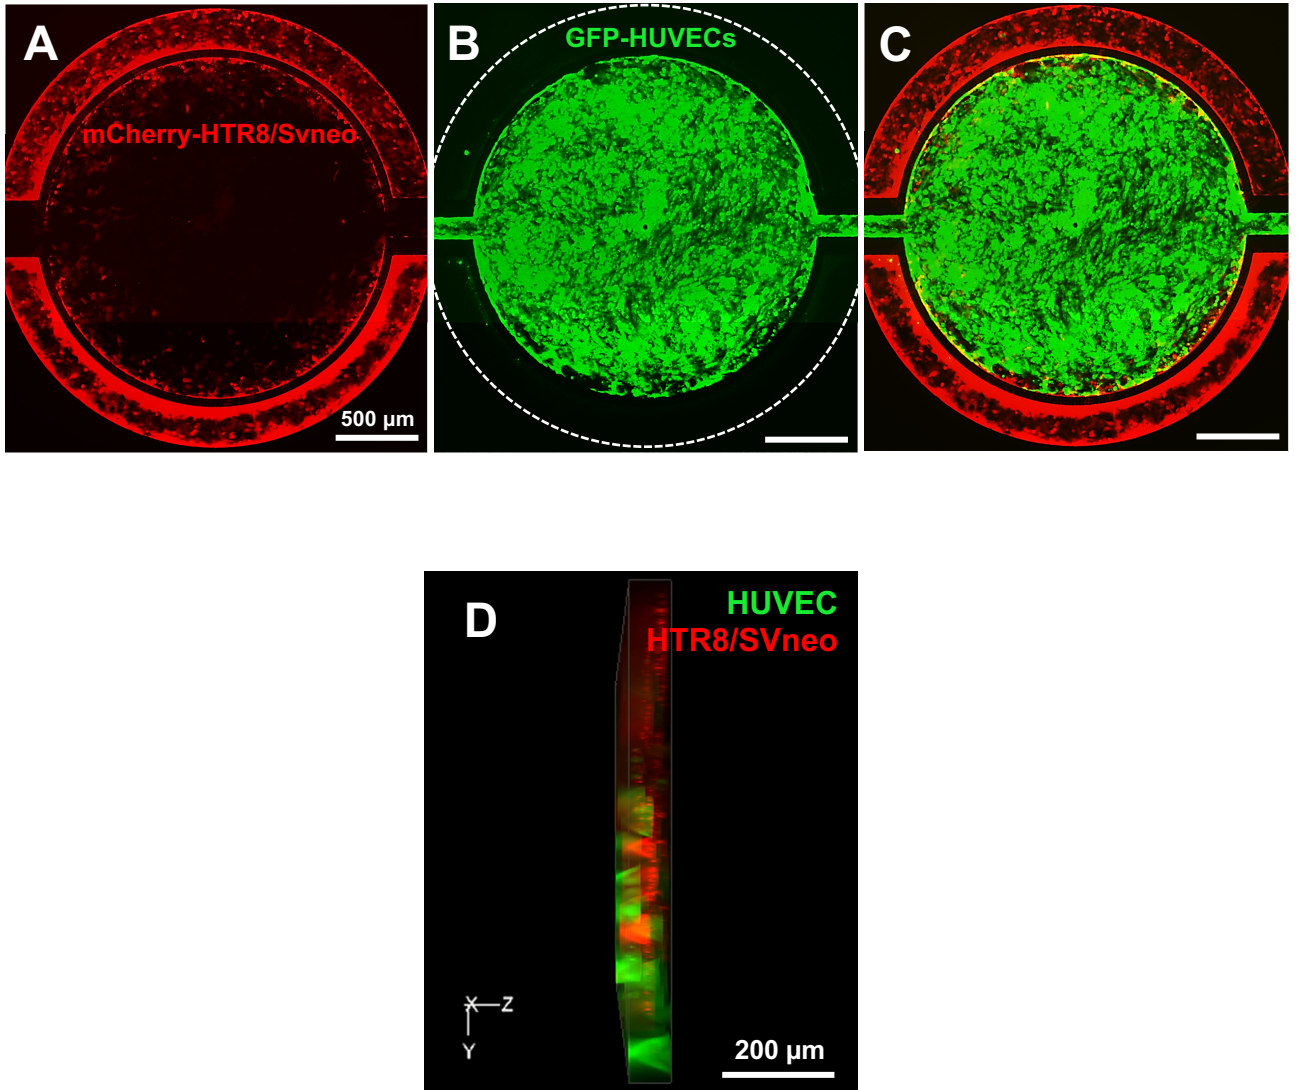

**Supplemental Figure 2.** Fluorescence tagged HTR8/Svneo cells and HUVECs cells after 3 days of culture in the microfluidic chip (culture conditions: fibronectin, 30 million cells/ml, and 0.01  $\mu\text{l}/\text{min}$  flow speed). **(A)** mCherry tagged HTR8/SVneo cells (red), **(B)** GFP tagged HUVECs cells (green), **(C)** merged. **(D)** Z-stack image of cell-cell interaction between GFP tagged HUVECs and mCherry tagged HTR8/SVneo cells.

# Supplemental Figure 3

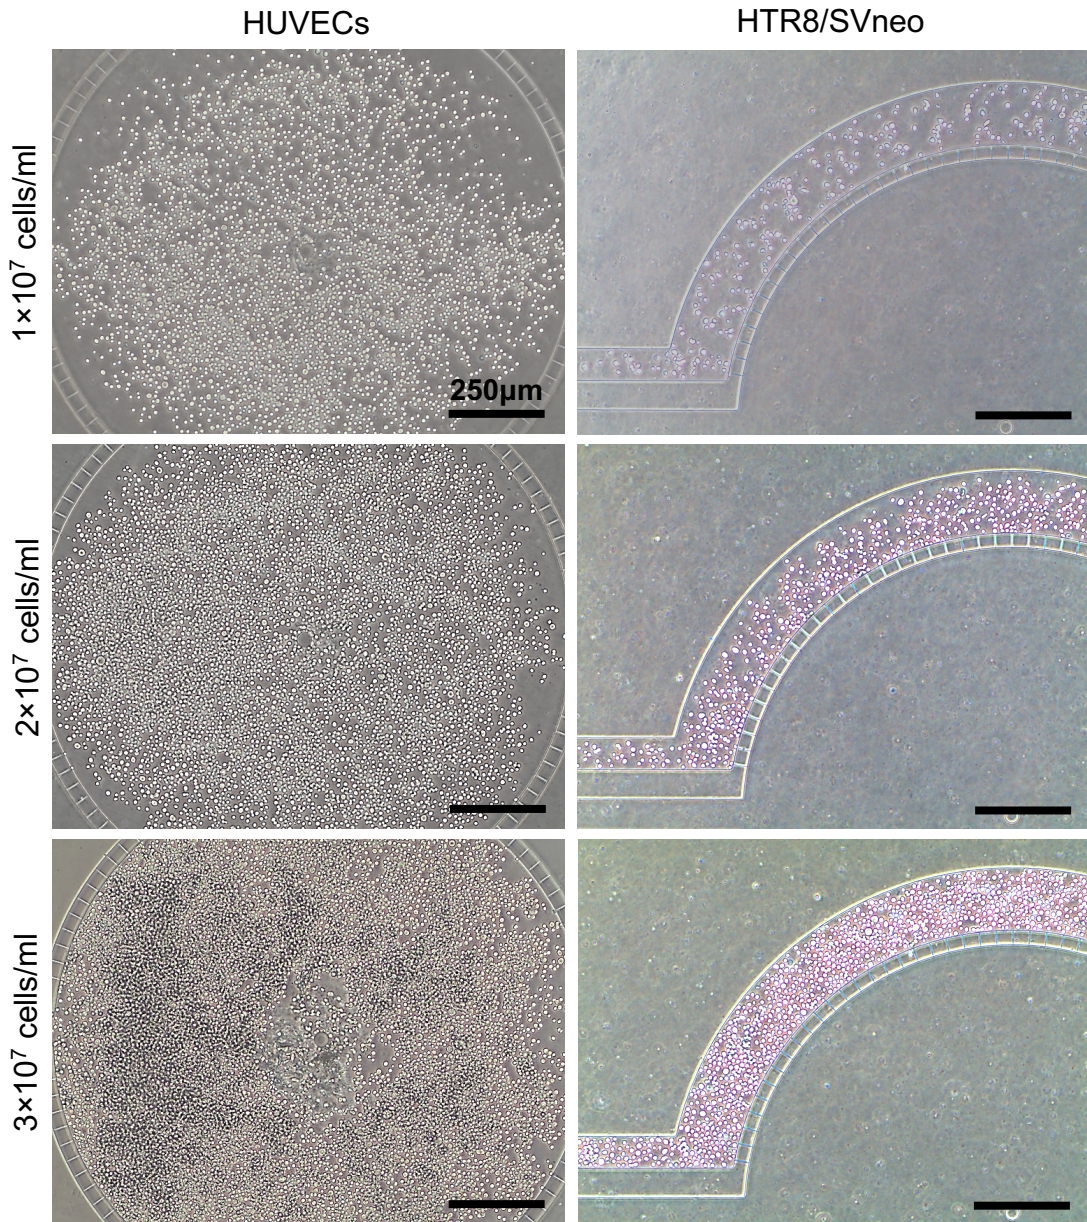

**Supplemental Figure 3.** Testing cell seeding density. HUVECs (*left panel*) and HTR8/SVneo (*right panel*) cells were seeded into the central compartment and outer channels, respectively, in cell densities of 1, 2, or 3 x 10<sup>7</sup> cells/ml.



# Supplemental Figure 4

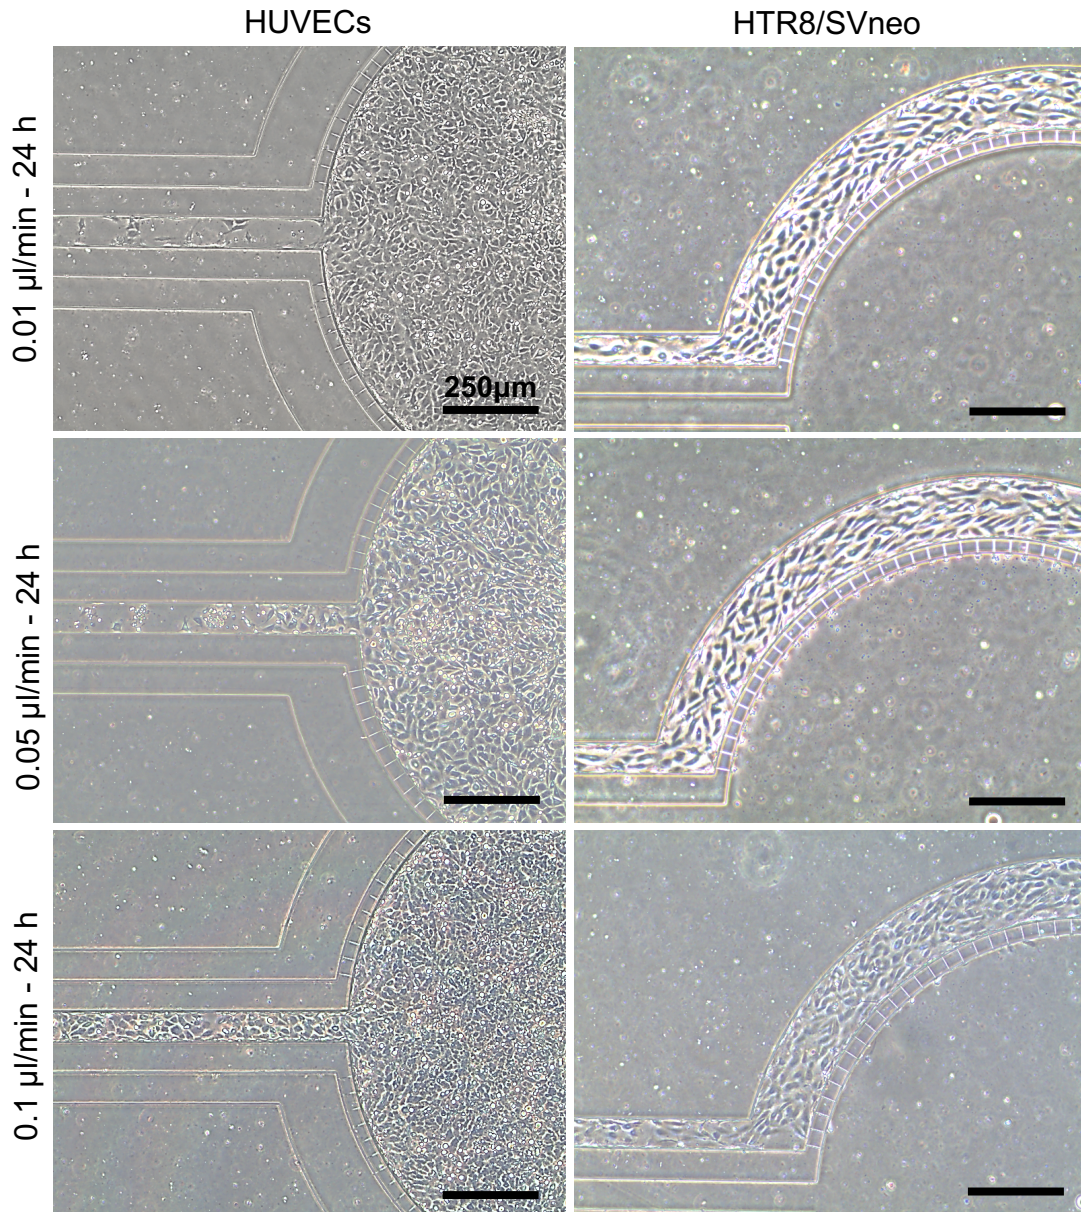

**Supplemental Figure 4.** Testing media flow speeds. HUVECs (*left panel*) and HTR8/SVneo cells (*right panel*) were seeded (density of  $3 \times 10^7$  cells/ml) into the central compartment and outer channels, respectively. After overnight adhesion, cells were flushed with medium for 24 h at 0.01, 0.05, or 0.1  $\mu\text{l}/\text{min}$  flow speeds.

# Supplemental Figure 5

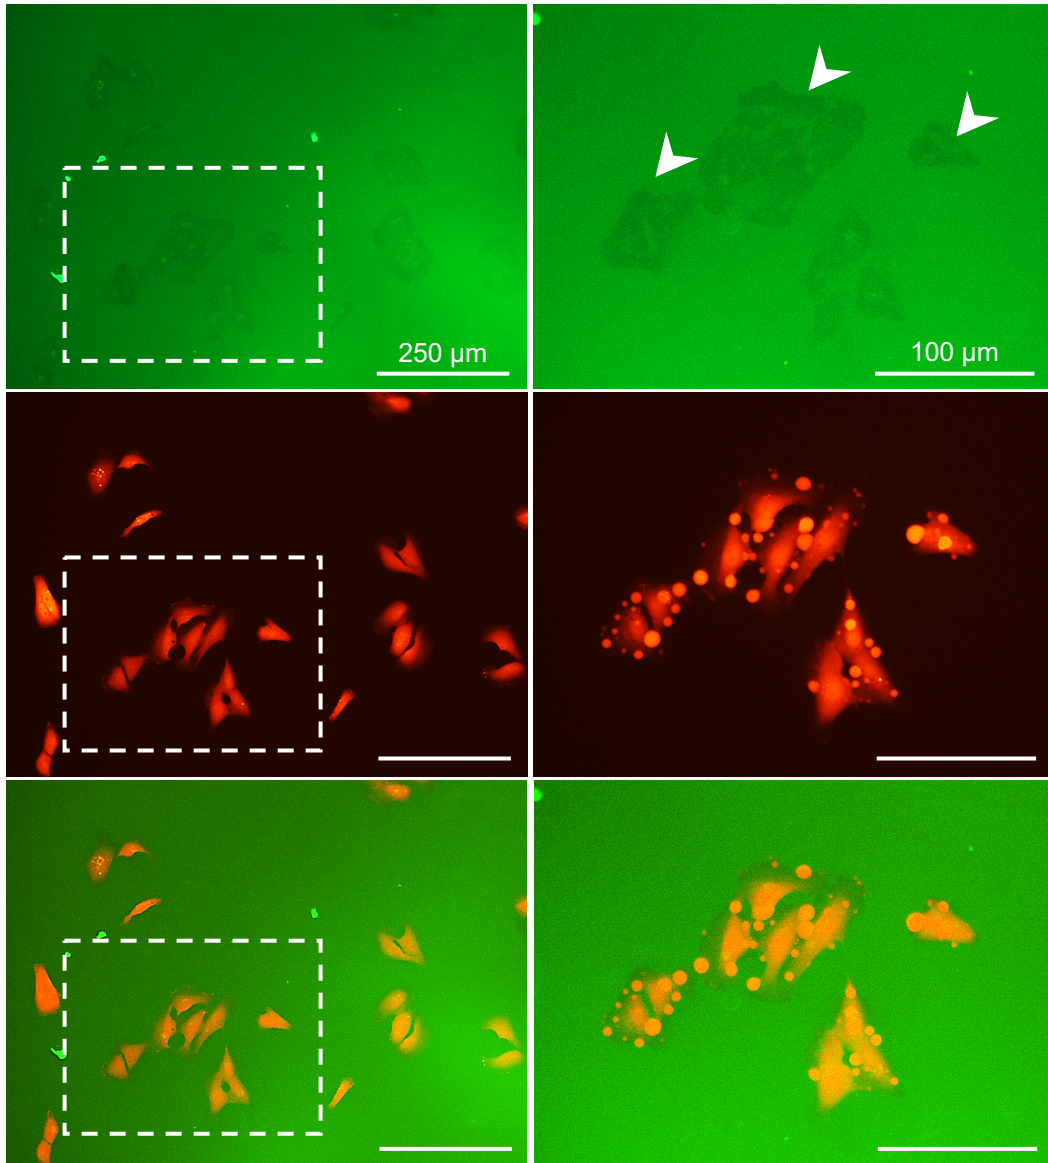

**Supplemental Figure 5.** Extracellular matrix degradation by HTR8/SVneo cells. 96-well plates were precoated with gelatin-FITC (60 µl, 1 mg/ml) overnight at 4 °C. Thereafter, plates were pre-warmed (37 °C and 5% CO<sub>2</sub>) for 30 min and seeded with HTR8/Svneo-mCherry cells. Fluorescence micrographs show degradation of the gelatin-FITC layer after 24 h incubation (dark areas, *arrows*). Right panels are higher magnification indents (*white stripped lines*) of left panel images.

# Supplemental Figure 6

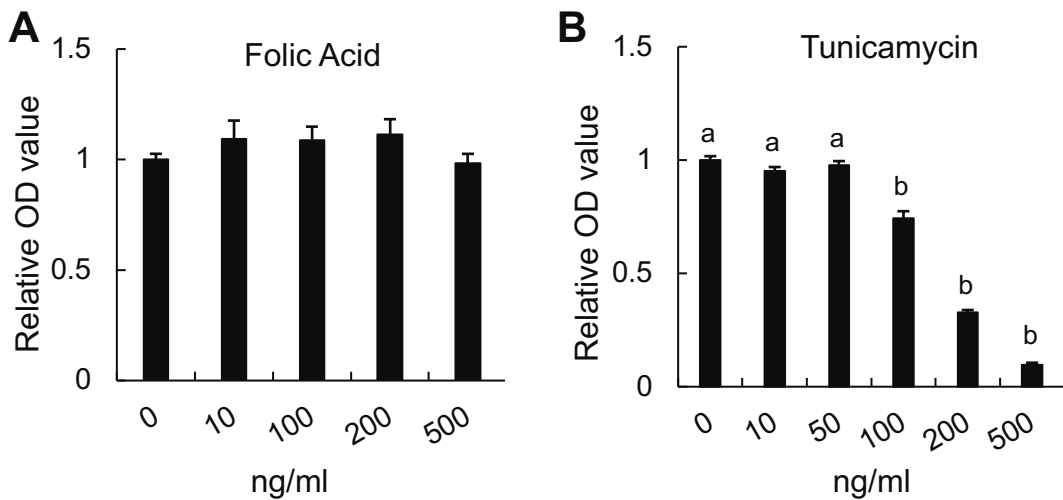

**Supplemental Figure 6.** Cytotoxicity effect of folic acid (0, 10, 100, 200 and 500 ng/ml) (**A**) and tunicamycin (0, 10, 50, 100, 200 and 500 ng/ml) (**B**) on HTR8/SVneo cells was assessed with MTT assay and quantified by optical density (OD) value after 5 days of exposure. Different letters denote differences between the control and each of the treatment groups ( $a \neq b$  represent  $P < 0.05$ ).



# Supplemental Figure 7

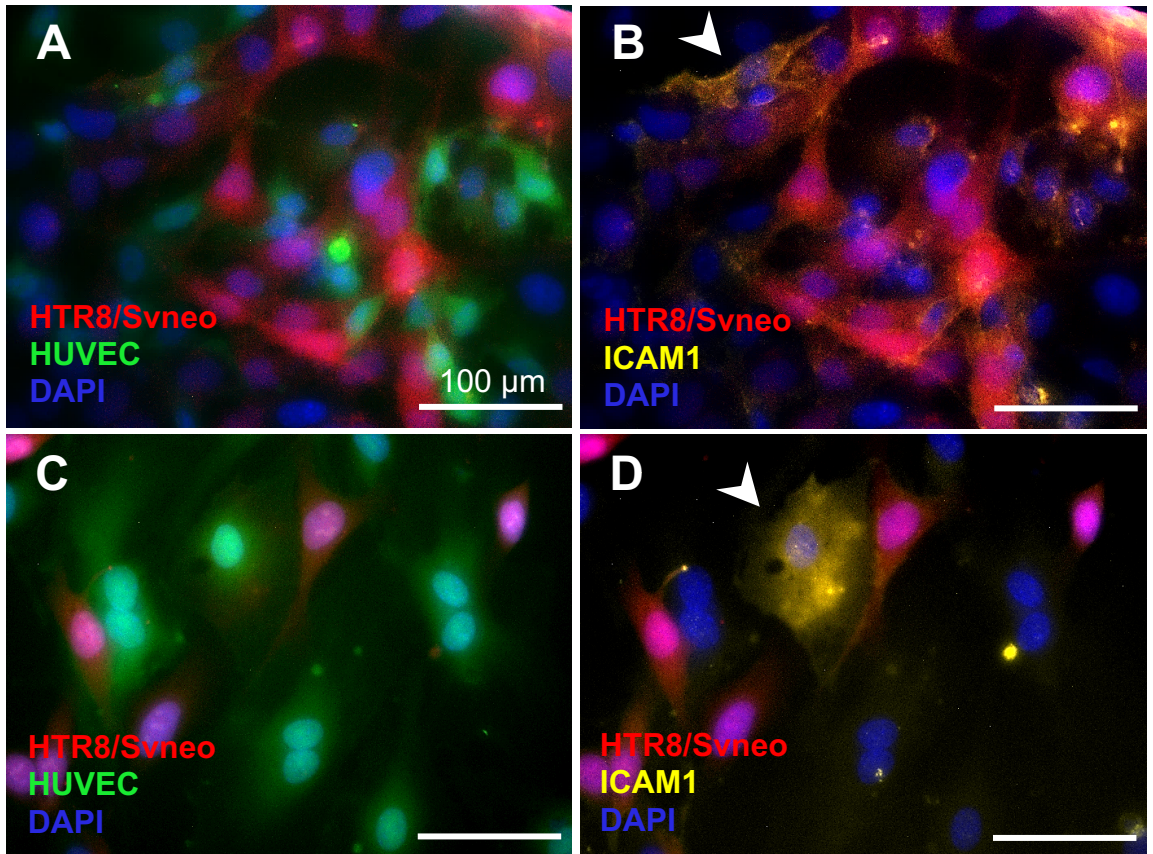

**Supplemental Figure 7.** Cell-to-cell interaction between GFP tagged HUVECs and mCherry tagged HTR8/SVneo cells. ICAM1 expression is enriched (*white arrows*) in HUVEC cells upon interaction with HTR8/SVneo cells after 72 h and 24 h incubation in the 3D microfluidic chip (A, B) and cell culture dish (C, D).

# Supplemental Figure 8

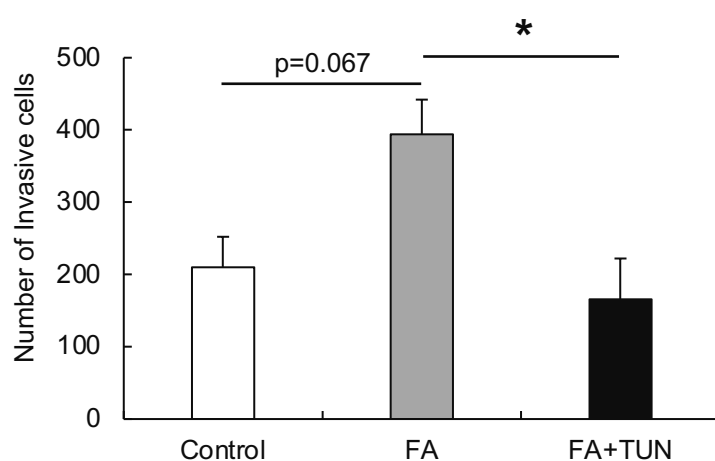

**Supplemental Figure 8.** Quantification of invasive cells into the central compartment of the microfluidic chip after 72 h exposure to folic acid (FA) or folic acid + tunicamycin; FA + TUN). Asterisks denote differences among treatments ( $P < 0.05$ ).

# Supplemental Figure 9

## A Negative Control

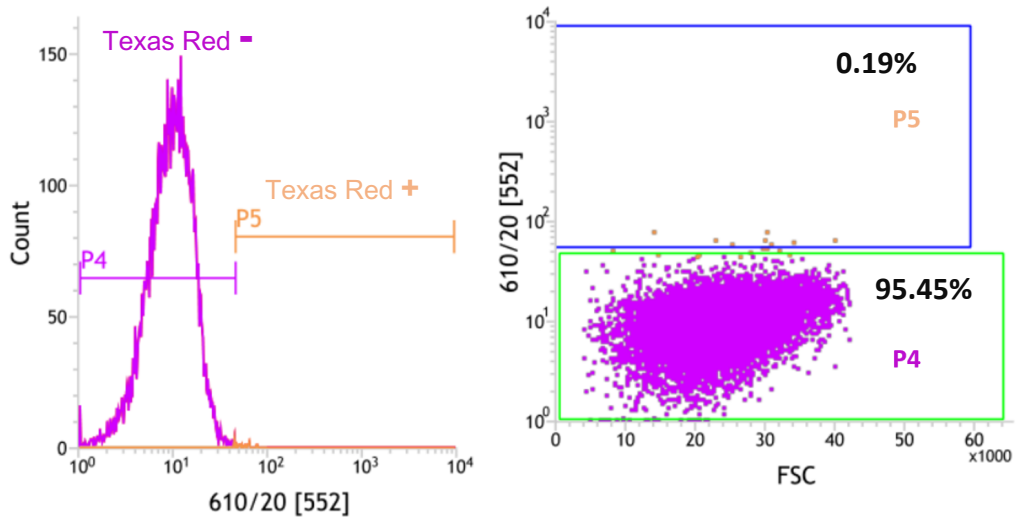

## B Positive Control

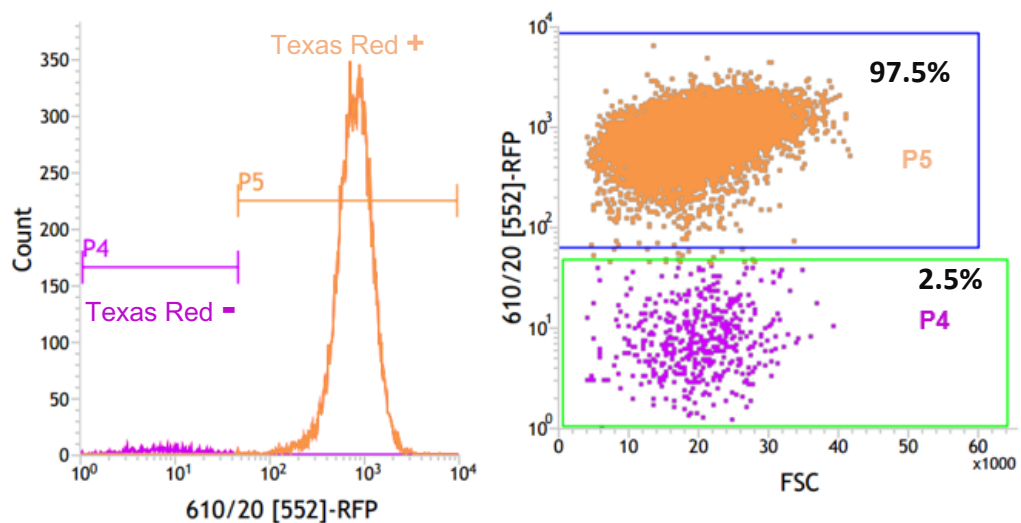

**Supplement Figure 9.** Flow cytometry analysis. Wild type (WT) and mCherry tagged HTR8/SVneo cells were analyzed by flow cytometry to optimize the parameters for cell sorting. **A.** Negative control: WT HTR8/SVneo cells. **B.** Positive control: mCherry tagged HTR8/SVneo cells.
